# Supplementary material for: Charge transport in electrospinning of polyelectrolyte solutions
Source: Royal Society of Chemistry journal article supplement (doi:10.1039/d4sm00605d), 2024-01-01
Supplement: d4sm00605d1.pdf [file d4sm00605d1.pdf]

*Supporting Information*

Charge transport in electrospinning of  
polyelectrolyte solutions

*Patrick Martin, Eyal Zussman*

NanoEngineering Group, Faculty of Mechanical Engineering

Technion – Israel Institute of Technology, Haifa, Israel

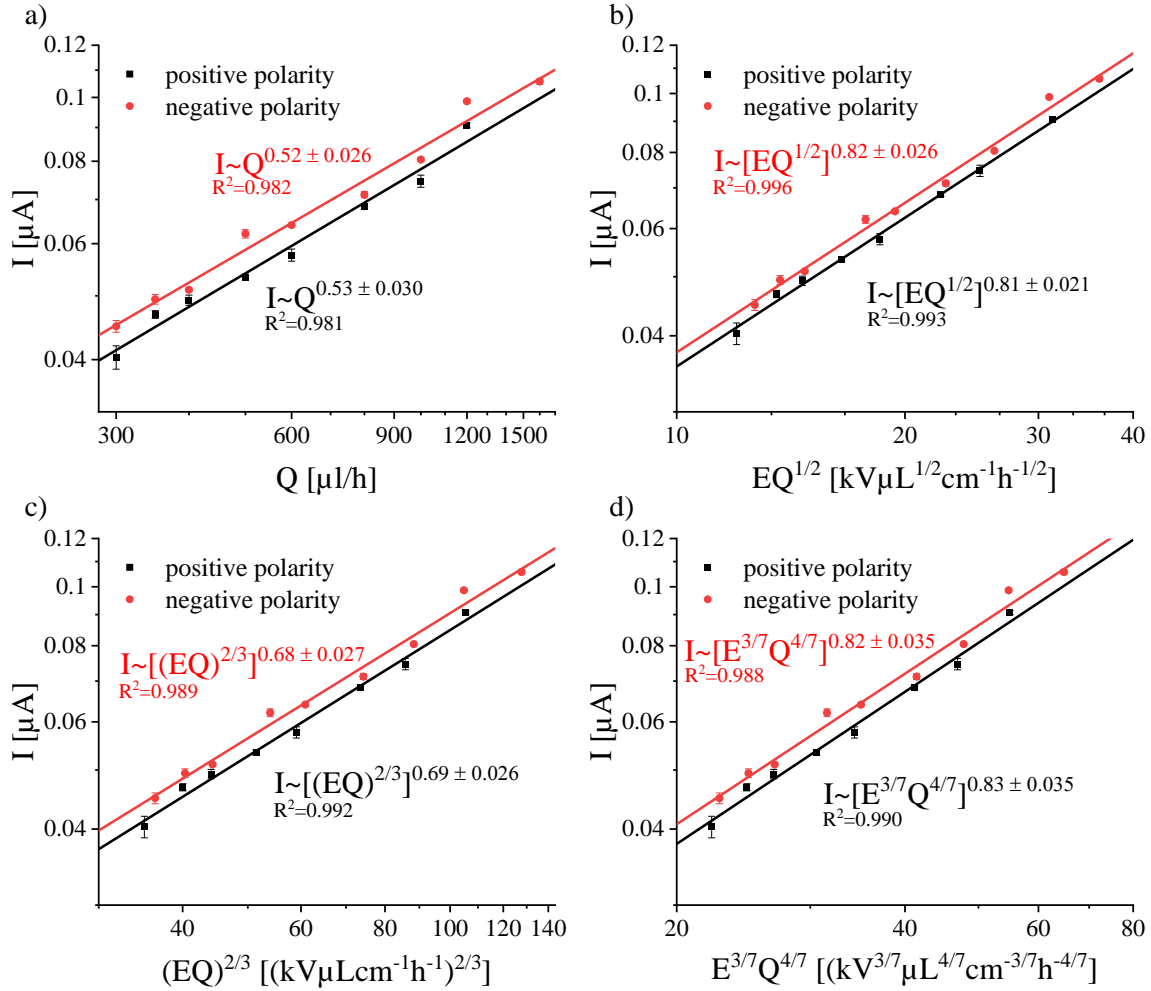

Fig. S1: Emitted current during electrospinning of neutral PVP in water/ethanol (6/4 v/v): a) depending on  $Q$ ; b) as a function of  $EQ^{1/2}$ ; c) as a function of  $(EQ)^{2/3}$  (viscosity-dominated jet); d) as a function of  $E^{3/7}Q^{4/7}$  (capillary-dominated jet). Error bars are based on standard deviation.

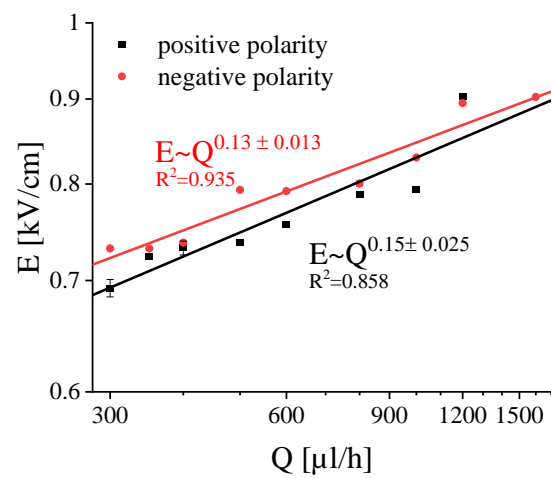

Fig. S2: Applied electric field as a function of Q for a stable cone-jet electrospinning process of neutral PVP in water/ethanol (6/4 v/v). Error bars are based on standard deviation.

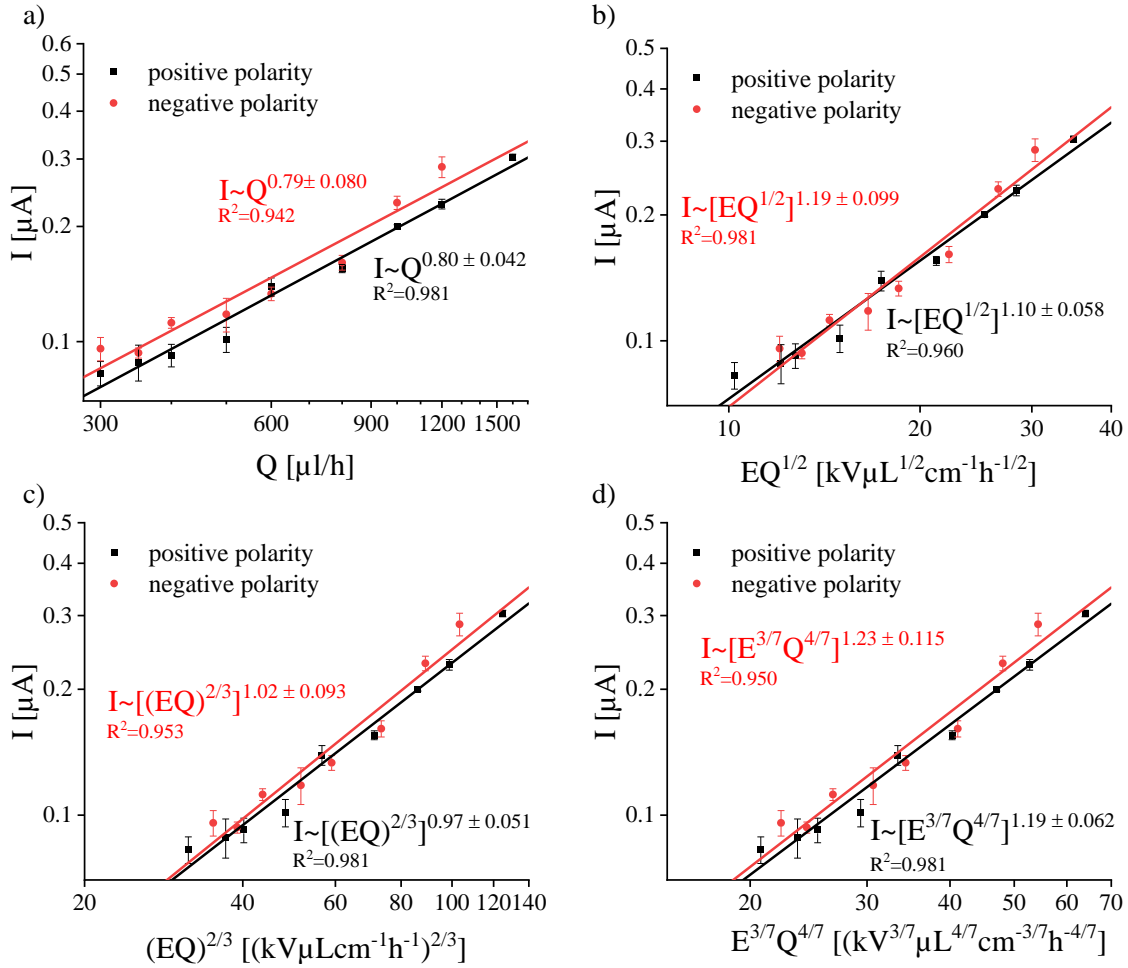

Fig. S3: Emitted current during electrospinning of uncharged PAA at pH 2.8 in water/ethanol (6/4 v/v): a) depending on  $Q$ ; b) as a function of  $EQ^{1/2}$ ; c) as a function of  $(EQ)^{2/3}$  (viscosity-dominated jet); d) as a function of  $E^{3/7}Q^{4/7}$  (capillary-dominated jet). Error bars are based on standard deviation.

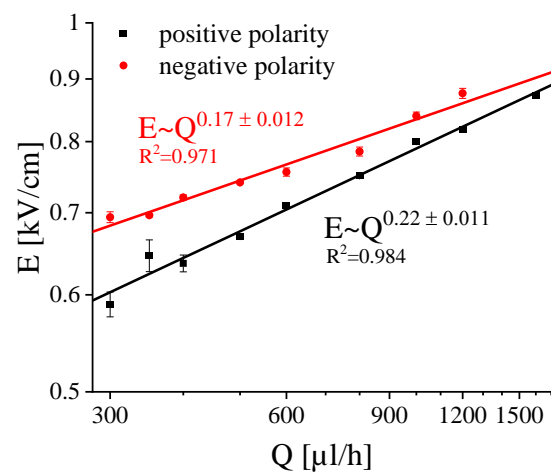

Fig. S4: Applied electric field as a function of Q for a stable cone-jet electrospinning process of uncharged PAA at pH 2.8 in water/ethanol (6/4 v/v). Error bars are based on standard deviation.

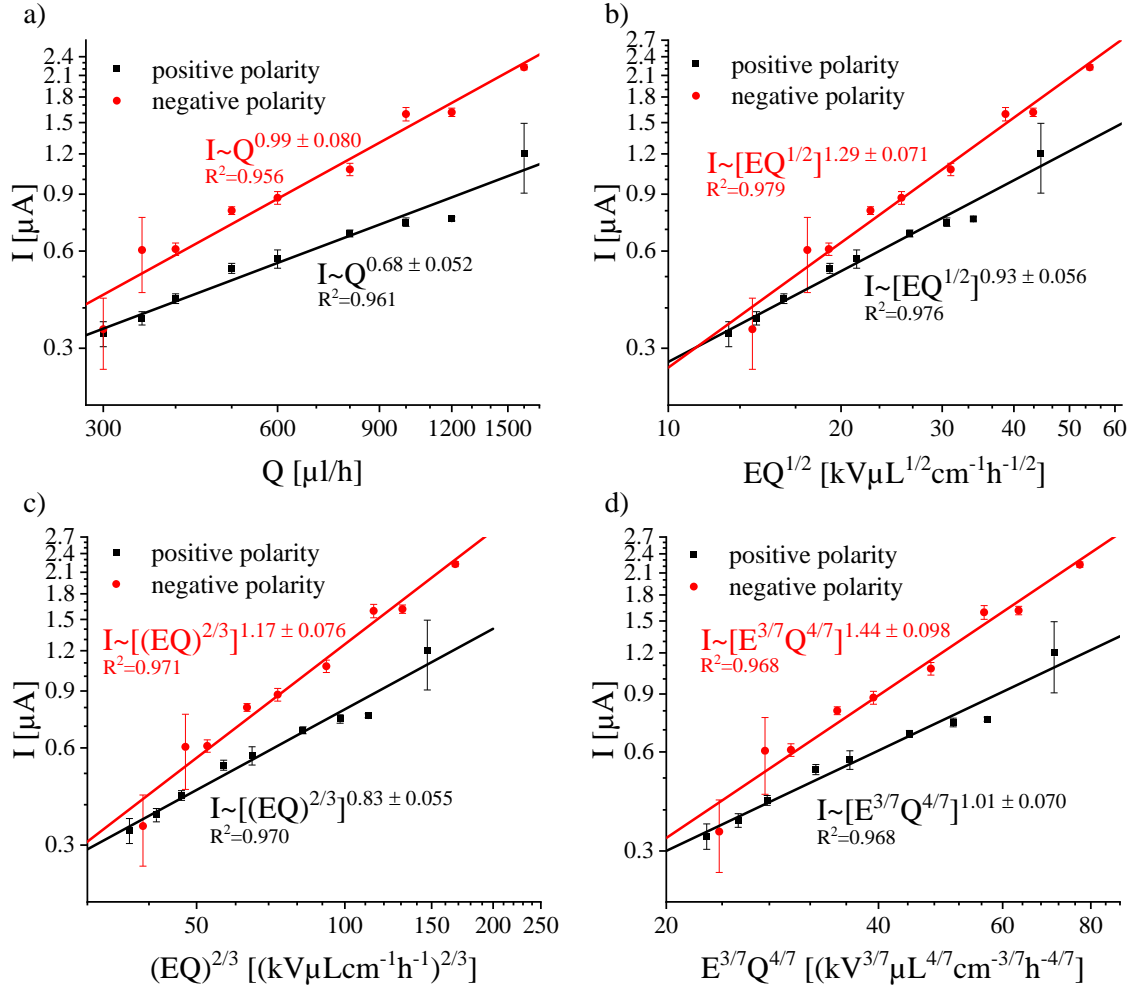

Fig. S5: Emitted current during electrospinning of charged PAA at pH 4.5 in water/ethanol (6/4 v/v): a) depending on  $Q$ ; b) as a function of  $EQ^{1/2}$ ; c) as a function of  $(EQ)^{2/3}$  (viscosity-dominated jet); d) as a function of  $E^{3/7}Q^{4/7}$  (capillary-dominated jet). Error bars are based on standard deviation.

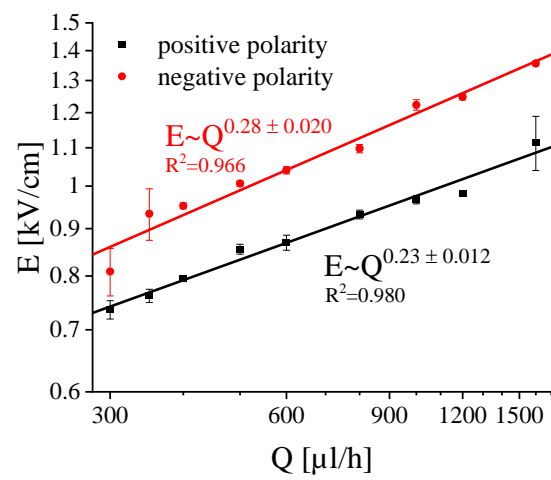

Fig. S6: Applied electric field as a function of  $Q$  for a stable cone-jet electrospinning process of charged PAA at pH 4.5 in water/ethanol (6/4 v/v). Error bars are based on standard deviation.
